1 **Identification of new *Dickeya dadantii* virulence factors secreted**  
2 **by the type 2 secretion system.**

3

4

5

6 **Guy Condemine\* and Bastien Le Derout**

7

8

9 Univ Lyon, Université Lyon 1, INSA de Lyon, CNRS UMR 5240 Microbiologie Adaptation  
10 et Pathogénie, F-69622 Villeurbanne, France.

11

12 \* Corresponding author: [guy.condemine@insa-lyon.fr](mailto:guy.condemine@insa-lyon.fr)

13

14 Short title: *Dickeya dadantii* virulence factors

15

16

## 17 **ABSTRACT**

18 *Dickeya* are plant pathogenic bacteria able to provoke disease on a wide range of plants. A type  
19 2 secretion system (T2SS) named Out is necessary for bacterial virulence. Its study in *D.*  
20 *dadantii* showed that it secretes a wide range of plant cell wall degrading enzymes, including  
21 pectinases and a cellulase. However, the full repertoire of exoproteins it can secrete has  
22 probably not yet been identified. Secreted proteins are first addressed to the periplasm before  
23 their secretion by Out. No secretion signal present on the protein allows the identification of  
24 substrates of a T2SS. To identify new Out substrates, we analyzed *D. dadantii* transcriptome  
25 data obtained in plant infection condition and searched for genes strongly induced encoding a  
26 protein with a signal sequence. We identified four new Out-secreted proteins: the expansin  
27 YoaJ, the putative virulence factor VirK and two proteins of the DUF 4879 family, SvfA and  
28 SvfB. We showed that SvfA and SvfB are required for full virulence of *D. dadantii* and showed  
29 that *svf* genes are present in a variable number of copies in other *Pectobacteriaceae*, up to three  
30 in *D. fangzhongdai*. This work opens the way to the study of the role of non-pectinolytic  
31 proteins secreted by the Out pathway in *Pectobacteriaceae*.

32

## 33 **IMPORTANCE**

34 The plant pathogen *Dickeya* rely on a type 2 secretion system named Out for their pathogenicity.  
35 Importance of plant cell wall degrading enzymes secreted by this system has been well studied.  
36 However, existence and role of other Out-secreted proteins has barely been investigated. By  
37 mining *D. dadantii* transcriptome data, we identified four new Out-secreted proteins. We  
38 showed that two of them, SvfA and SvfB, are necessary for the full virulence of the bacteria.  
39 These findings show that identification of all the proteins secreted by the *Dickeya* Out system  
40 is necessary for a better knowledge of the virulence of these bacteria.

41

42

43

## 44 INTRODUCTION

45 Soft rot *Pectobacteriaceae* (SRP), *Dickeya* and *Pectobacterium*, are plant pathogenic bacteria  
46 that can provoke disease on more than 35% of angiosperm plant orders, including both monocot  
47 and dicot plants (1). Among those, there is a wide range of plants of agronomic interest such as  
48 potato, rice, chicory, cabbage or ornamentals on which they can cause severe losses. Symptoms  
49 are usually soft rot but these bacteria can provoke blackleg or wilting on aerial parts of potato.  
50 Recently, diseases on woody plants caused by *Dickeya* have been reported (2). There is no  
51 efficient way to fight these bacterial diseases. There are actually twelve species of *Dickeya*  
52 described, isolated either from infected plants (type strain of *D. chrysanthemi* isolated from  
53 *Chrysanthemum morifolium*, *D. dadantii* subsp. *dadantii* from *Pelargonium capitum*, *D.*  
54 *dadantii* subsp. *diefenbachiae* from *Dieffenbachia* sp., *D. dianthicola* from *Dianthus*  
55 *caryophyllus*, *D. zaeae* from *Zea mays*, *D. oryzae* from *Oryza sativa*, *D. paradisiaca* from *Musa*  
56 *paradisiaca*, *D. solani* from *Solanum tuberosum*, *D. fangzhongdai* from *Pyrus pyrifolia*, *D.*  
57 *poaceiphila* from *Saccharum officinarum*) (3)(4)(5)(6)(7) or from river or lake waters (*D.*  
58 *aquatica*, *D. lacustris* and *D. undicola*) (8)(9)(10). The role of protein secretion systems on the  
59 onset of the disease provoked by these bacteria has been recognized long ago (11). In contrast  
60 to many plant pathogenic bacteria, the type three Hrp secretion system is not the main  
61 determinant for SRP virulence (12). The main virulence factor for these bacteria is a type 2  
62 secretion system (T2SS) named Out. It allows the secretion of enzymes that degrade the  
63 components of the plant cell wall, leading to the soft rot symptom distinctive of the disease.  
64 The first Out-secreted proteins to be identified were a set of pectinases and a cellulase which  
65 are easily detectable by simple enzymatic tests (13) (11). The pectinolytic secretome of the  
66 model strain *D. dadantii* 3937 has been studied in detail by cloning the genes of these easily

67 detectable enzymes. *D. dadantii* secretes by the Out machinery nine pectate lyases, one pectin  
68 methylesterase, one pectin acetyesterase and one rhamnogalacturonate lyase (14). A proteomic  
69 analysis of the secreted proteins by 2D gel electrophoresis allowed the identification of two  
70 other secreted proteins, the feruloyl esterase FaeD and a protein with homology with a  
71 *Xanthomonas campestris* avirulence protein AvrL (15). A search in *D. dadantii* of homologues  
72 of proteins secreted by the Out T2SS of *Pectobacterium atrosepticum* (16) recently led to the  
73 characterization of the metal binding protein IbpS (17). There is no strict host specificity for  
74 *Dickeya* species, however some of them show a preference for some plant species. Since all the  
75 pectinolytic enzymes studied in *D. dadantii* are present in most of other *Dickeya* species these  
76 enzymes are probably not responsible for the host preference observed for these bacteria (18).  
77 We hypothesized that additional T2SS-secreted proteins specific for some species might exist  
78 and play a role in the host preference. To identify such proteins, we analyzed previously  
79 published *D. dadantii* transcriptome data, looking for genes induced in plant infection  
80 conditions and encoding proteins with a signal sequence. We identified several proteins  
81 secreted by the Out machinery and showed that two proteins of the DUF4879 family, SvfA and  
82 SvfB are *D. dadantii* virulence factors.

83

## 84 MATERIAL AND METHODS

85

### 86 Bacterial strains and growth conditions.

87 Bacterial strains, phages, plasmids and oligonucleotides used in this study are described in Table 2. *D.*  
88 *dadantii* and *E. coli* cells were grown at 30 and 37°C respectively in LB medium or M63 minimal medium  
89 supplemented with a carbon source (0.2%, w/v unless otherwise indicated). When required antibiotics  
90 were added at the following concentrations: ampicillin, 100 mg l<sup>-1</sup>, kanamycin and chloramphenicol, 25

91 mg l<sup>-1</sup>. Media were solidified with 1.5% (w/v) agar. Transduction with phage ΦEC2 was performed  
92 according to Résibois *et al.* (40)

### 93 **Mutant construction.**

94 To construct strain A6418 that contains a *svfA-uidA* fusion a 1.3 kb DNA fragment containing  
95 *svfA* was amplified with primers 17176H+ and 17176A. The resulting fragment was inserted into  
96 the pGEM-T plasmid (Promega). A XbaI site was created by site directed mutagenesis with the  
97 primers 17176XbaF and 17176XbaR into the *svfA* coding sequence and a *uidA-kanR* cassette was  
98 inserted into this XbaI site. To construct strain A6467 that contains a *svfB-uidA-kanR* fusion and  
99 a CmR cassette a 2000bp DNA fragment containing *svfB* was amplified with the primers  
100 15544L2+ and 15544L2-. The resulting fragment was inserted into the pGEM-T plasmid. A XmaI  
101 site was created by site directed mutagenesis into *svfB* coding sequence with the primers  
102 15544XmaF and 15544XmaR and a *uidA-kanR* cassette was inserted into this created unique XmaI  
103 site. All the constructs were recombined into the *D. dadantii* chromosome according to Roeder  
104 and Collmer (41). Recombinations were checked by PCR. His-tagged versions of the proteins  
105 SvfA, SvfB, YoaJ and VirK were constructed by amplifying the corresponding genes with the  
106 primers 17176H+ and 17176H-, 15544H+ and 15544H-, 14642H+ and 14642H-, VirKH+ and  
107 VirKH-, respectively. The resulting DNA fragments were cloned into plasmid pGEMT.

108

### 109 **Secretion assays and Western blots.**

110 *D. dadantii* strains containing the plasmid to test were grown overnight in LB medium in the  
111 presence of the appropriate antibiotic. Culture supernatant containing secreted proteins was  
112 separated from cells by centrifugation at 10,000 g for 3 min, and both fractions were loaded onto  
113 12% polyacrylamide gel electrophoresis (SDS-PAGE). The proteins were next transferred onto  
114 Immobilon P membrane (Merck) and probed with Ni-NTA-HRP.

115

116 **Pathogenicity tests.**

117 Bacteria were grown overnight in LB medium, centrifuged and resuspended at OD<sub>600</sub> 1 in M63  
118 medium. Potatoes were surface sterilized with 70% ethanol and dried. A hole was made with a  
119 pipette tip and 10  $\mu$ l of bacteria were deposited in the hole which was covered with mineral oil.  
120 Potatoes were placed over a wet paper in a tray contained in a plastic bag to maintain moisture.  
121 After 48 h at 30°C, the weight of rotten tissue was measured.

122

123 **Enzymatic assays.**

124  $\beta$ -glucuronidase assays were performed on toluenized extracts of cells grown to exponential  
125 phase using the method of Bardonnnet *et al* (42) with *p*-nitrophenyl- $\beta$ -D-glucuronate as the  
126 substrate.

127

128

129 **RESULTS**

130

131 **Identification of new Out-secreted proteins**

132 To have a more complete knowledge of the proteins secreted by the *D. dadantii* Out T2SS that  
133 could be involved in the pathogenicity process, we searched for candidate genes in recently  
134 published transcriptome data (19)(20). We selected genes strongly induced during plant  
135 infection and coding for a protein possessing a signal sequence. We retained the genes  
136 *Dda3937\_01687*, *Dda3937\_00585* (thereafter named SvFA and SvFB, respectively) and  
137 *Dda3937\_00081* (also named *yoaJ*). We also retained VirK, a protein of unknown function  
138 with a signal sequence identified among the genes controlled by the transcriptional regulator  
139 PecS of many virulence factors (21). Each protein was tagged with a His-tag and its secretion  
140 was analyzed in the *D. dadantii* wild type strain and an *outD* mutant in which the Out machinery  
141 is not functional. The proteins SvFA, SvFB, YoaJ and VirK were detected in the supernatant of

142 the wild type strain but not of the mutant, demonstrating their secretion by the Out machinery  
143 (Fig. 1). Production of these proteins from a gene cloned on a multicopy plasmid may explain  
144 why secretion was not total in the wild type strain.

145

146 YoaJ is a PecS-regulated gene (21) and it was found among the most induced genes during  
147 *Arabidopsis* infection or culture in the presence of plant extracts (19). It encodes a protein with  
148 homology to expansins. These proteins are able to non-enzymatically loosen cell wall cellulose.  
149 They are found in all plants where they have a role in cell wall extension and also in many plant  
150 pathogenic microorganisms (22). Their role in virulence has been shown in *Ralstonia*  
151 *solanacearum*, in *P. atrosepticum*, *P. Brasiliense* and in the plant pathogen *Erwinia*  
152 *tracheiphila* (23) (24). The role of *D. dadantii* expansin is probably the same. VirK is a protein  
153 of unknown function that has homologues in several plant pathogenic bacteria such as *R.*  
154 *solanacearum*, *Agrobacterium tumefaciens*, *Lonsdalea* and *Xanthomonas*. VirK is controlled  
155 by PecS and induced during *Arabidopsis* infection or culture in the presence of plant extracts  
156 (21) (20). No symptom for the *D. dadantii virK* mutant was observed whatever the plant tested  
157 (21). The two proteins SvfA and SvfB are studied in the next paragraphs.

158

### 159 **SvfA and Svfb are virulence factors**

160 *svfA* and *svfB* are among the most induced *D. dadantii* genes during *Arabidopsis* infection or  
161 during culture of the bacteria in the presence of plant extracts (19). They are also strongly  
162 expressed during maceration of potato tubers by *D. dianthicola* and *D. solani* (25). The two *D.*  
163 *dadantii* proteins share 43% identity and 58% similarity in amino acid composition (Fig. 2).  
164 SvfA is 187 amino acid long (165 for the mature form, 17.5 kDa) and Svfb is 198 amino acid  
165 long (177 for the mature form, 18.9 kDa). These proteins belong to the DUF 4879 family of  
166 proteins. Proteins of this family have no known function. YoaJ, a protein of the DUF 4879

167 family showing low homology with Svfb, is among the most highly secreted protein of *Bacillus*  
168 *subtilis* (26). YoaA is also present in *B. cereus* and in the insect pathogen *B. thuringiensis*. *B.*  
169 *subtilis* YoaA is shorter than Svfa and Svfb, missing the N-terminal more variable part (Fig.  
170 2).

171  
172 *svfA* and *svfB* mutants have been constructed and their pathogenicity has been tested on potato.  
173 The *svfA* mutant was significantly less aggressive than the wild type strain while the *svfB* mutant  
174 was not significantly affected (Fig. 3A). Virulence of the *svfA* mutant could be restored by  
175 introduction of a plasmid bearing the wild type *svfA* gene (Fig. 3B). Virulence of the double  
176 *svfA svfB* mutant was further reduced showing that the role of Svfb is additive to that of Svfa  
177 (Fig. 3A). Thus, genes *Dda3937\_01687* and *Dda3937\_00585* were named *svfA* and *svfB* for  
178 secreted virulence factor A and B.

179  
180 All our attempts to overproduce the proteins Svfa and Svfb in order to purify them and to study  
181 more precisely their function were unsuccessful because their production was toxic to the  
182 bacterial cells engineered to overproduce them.

183

184

### 185 **Expression of *svfA* and *svfB***

186 To try to identify the function of Svfa and Svfb, we analyzed the conditions in which their  
187 genes are expressed. We tested the effect of galacturonate and polygalacturonate, two  
188 compounds that are inducers of the expression of the main virulence factors, the pectate lyases,  
189 and of glucose, which represses it. We also analyzed the effect of mutations in genes controlling  
190 several aspects of *D. dadantii* virulence. KdgR represses the pectinase, pectin degradation and  
191 *out* genes (27). Its inducer is 2-keto-3-deoxygluconate, a polygalacturonate and galacturonate



192 catabolic derivative. PecS controls genes encoding the pectinases, diverse secreted protein, the  
193 Out machinery and proteins involved in resistance to oxidative stress (28). PecT is a regulator  
194 of the pectate lyase, motility and exopolysaccharide synthesis genes (29). Pir regulates  
195 hyperinduction of pectate lyases in response to plant extracts (30). GacA, the regulator of the  
196 two-component regulatory system GacA-GacS, is a global regulator required for disease  
197 expression in response to the metabolic status of the bacteria (31). Expression of *svfA* was  
198 slightly induced by polygalacturonate but not by galacturonate (Fig. 4A). However, expression  
199 of this gene was not modified in a *kdgR* background indicating that induction by  
200 polygalacturonate is not mediated by KdgR. Growth in the presence of chicory chunks strongly  
201 induced *svfA* expression as expected from transcriptomic data showing induction in the  
202 presence of plant extract. A high concentration of glucose led to a strong induction of *svfA*  
203 expression (Fig. 4A). This regulation is mediated by the catabolite repressor protein CRP since  
204 a mutation in the *crp* gene derepressed *svfA* expression. Thus, Crp is a repressor of *svfA*.  
205 Although it had not been previously identified as a PecS-regulated gene (21), *svfA* expression  
206 is increased in a *pecS* background. A *pir* mutation provoked a weak derepression of *svfA*  
207 expression. Neither PecT nor GacA significantly regulate *svfA* expression (Fig. 4A).

208

209 Regulation of *svfB* shows some similarity to that of *svfA*: it was not induced by galacturonate,  
210 polygalacturonate or regulated by KdgR, it was induced by glucose and repressed by Crp, and  
211 it was repressed by PecS (Fig. 4B). However, a few differences can be noted: in contrast to  
212 what is observed with *svfA*, no induction by plant pieces was observed for *svfB* and PecT was  
213 a repressor of *svfB* expression while Pir did not seem to control it (Fig. 4B).

214

215

216 **Occurrence of the new secreted proteins in other *Dickeya* species**

217 Presence of *svfA*, *svfB*, *virK* and *yoaJ* was searched in the genome of all the *Dickeya* type strains,  
218 and in a few *Pectobacterium* strains (Table 1). Presence and number of proteins of the DUF  
219 4879 family is variable among *Dickeya* species. The gene *svfA* is present in all strains except  
220 *D. zea*, *D. chrysanthemi*, *D. poaceiphila* and *D. paradisiaca*. The gene *svfB* is present in most  
221 species but is absent in *D. chrysanthemi*, *D. poaceiphila* and *D. paradisiaca*, *D. undicola* and  
222 *D. aquatica*. A third gene located next to *svfA* and probably resulting from a duplication is  
223 found in *D. fangzhongdai* and *D. undicola*. It was named *svfC*. It has 53% homology with *D.*  
224 *dadantii* SvfA and 34% with *D. dadantii* SvfB. SvfC is shorter than SvfA and SvfB (126 amino  
225 acid for the mature protein, 13.2 kDa) and has the same size as *B. cereus* YoaA (Fig. 2). It  
226 possesses a signal sequence, indicating that it could also be secreted by the Out system. Thus,  
227 the number of genes of the DUF 4879 family in *Dickeya* strains varies from 0 to 3. Homologues  
228 of the *svf* genes can also be found in some *Pectobacterium* strains (Table 1). For example, two  
229 copies are present in *P. carotovorum* subsp *carotovorum*. However, even in a given species, the  
230 gene may be present or not (presence of a homologue of *svfB* in 10 out of the 23 *P. brasiliense*  
231 strains present in the ASAP data bank (<https://asap.ahabs.wisc.edu/asap/home.php>). Outside  
232 *Pectobacteriaceae*, homologues of *svfB* can be found in a few Gammaproteobacteriaceae, i.d.  
233 in some *Photobacterium*, *Luteibacter* and *Pseudoalteromonas* strains. *yoaJ* is present in all  
234 *Dickeya* and *Pectobacterium* strains except *D. poaceiphila* and *D. paradisiaca*. *virK* is present  
235 in all *Dickeya* strains except in *D. aquatica* and absent in all *Pectobacterium* strains tested.

236

237 We also examined the presence or absence of genes of other non-pectinolytic proteins known  
238 to be secreted by a T2SS in *Dickeya* or *Pectobacterium*: *ibpS*, *nipE*, *xynA*, *avrL/avrM* (Table  
239 1). IbpS is a metal binding protein that prevents ROS-induced killing of bacteria (17). NipE is  
240 a toxin that provoke plant cell death (32). XynA is a xylanase that was identified in a corn strain  
241 of *Dickeya zea* previously named *Erwinia chrysanthemi* (33). AvrL is homologous to the

242 *Xanthomonas campestris* avirulence protein AvrL (15). Two very similar proteins, AvrL and  
243 AvrM, are encoded by *D. dadantii* 3937. AvrL was named Svx in *P. atrosepticum* where a role  
244 in virulence has been proven (34). However, its function in *Dickeya* has not been studied. IbpS  
245 is present in almost all the species, except *D. paradisiaca*. NipE is absent in *D. paradisiaca* and  
246 *D. poaceiphila*. Presence of XynA is variable in *Dickeya* strains and it is absent in  
247 *Pectobacterium*. A variation in the presence and number of AvrL can be observed in *Dickeya*  
248 strains (Table 1). Thus, the repertoire of T2SS-secreted protein known to be important for  
249 virulence is very variable from species to species.

250

## 251 **DISCUSSION**

253 The T2SS of *Dickeya* and *Pectobacterium* is a major virulence factor of these bacteria. The  
254 knowledge of the repertoire of secreted proteins is necessary to better understand the precise  
255 mechanisms of virulence of these bacteria. These analyses have been undertaken with the model  
256 strain *D. dadantii* 3937 and partially with *Pectobacterium atrosepticum* (35)(16). *Dickeya* and  
257 *Pectobacterium* are characterized by their ability to degrade pectin and they are identified by  
258 this characteristic on the semi selective Crystal Violet Pectate medium. They all secrete  
259 enzymes capable of degrading pectin (pectate lyases, polygalacturonases, pectin  
260 methylesterases). However, recent works show that other proteins are secreted by the Out T2SS  
261 (15)(16). In the present work we used published transcriptome data to identify new potential  
262 substrates of the *D. dadantii* T2SS. The most highly induced genes in a transcriptome  
263 experiment of *D. dadantii* infecting *A. thaliana* are known virulence genes (*pell*, *prtA*, *rhiE*,  
264 *paeY*, *rhaD*, *ibpS*, etc...) (19). However, in this top list some genes have no known function.  
265 The presence of a signal sequence in their product suggested that these proteins could be  
266 substrates of the T2SS necessary for the infection process. We showed here that the proteins  
267 SvfA, SvfB and YoaJ produced by genes present in the top list of those induced in Arabidopsis

268 are substrates of the Out T2SS. YoaJ belongs to the family of expansins, proteins that loosen  
269 cellulose fibers. Their role as a virulence factor has been shown in *P. brasiliense* and *P.*  
270 *atrosepticum* (23) and it probably has the same function in *D. dadantii* and other *Dickeya*  
271 species. No function could be predicted for SvfA and SvfB which belong to the DUF 4879  
272 family of proteins. However, a reduction of virulence of a *svfA* mutant and a *svfA svfB* double  
273 mutant on potato could be observed, proving a role of the proteins in the bacterial pathogenicity.  
274 Although an additive effect of the mutations was observed, they could not have exactly the  
275 same function. The mutants should be tested on various hosts to detect potential differences. It  
276 can be supposed that each protein would be more active on one type or one family of plant.  
277 Presence of three DUF 4879 proteins in *D. fangzhongdai* could explain its wide host range,  
278 from orchid to pear trees. Presence of homologues of SvfA and SvfB in *Photorhabdus* and in  
279 *B. thuringiensis* strains, two insect pathogens, indicates that the role of these proteins is not  
280 restricted to plant virulence but may participate to a common process of bacterial pathogeny.  
281 We also showed here that the PecS-regulated protein VirK is secreted by Out. No role on  
282 virulence had been observed for this protein with the chicory leaf model of infection (21). Other  
283 models should be tested to find the role of this protein.

284

285 Regulation of expression of the *svfA* and *svfB* genes is atypical for a *D. dadantii* gene involved  
286 in pathogeny. While expression of most of the virulence factors is induced in the presence of  
287 pectin or its derivatives through the repressor KdgR and repressed by glucose, that of *svfA* and  
288 *svfB* is opposite: it is activated by glucose and not controlled by KdgR. Expression of *svfA* is  
289 induced in the presence of plant tissue. This pattern of regulation has been described for *ibpS*,  
290 which is also strongly induced in *A. thaliana* (17). This could correspond to conditions  
291 encountered during the early phases of infection: pectin has not yet been degraded and glucose  
292 and saccharose are plentiful in plant tissues. *svfA* and *ibpS* could be among the earliest gene to

293 be induced at the onset of infection, before the genes involved in pectin degradation. However,  
294 regulation of these genes by PecS and PecT shows that *svfA* and *svfB* are fully integrated in the  
295 network of regulators that controls *D. dadantii* virulence.

296

297 This work has extended our knowledge of the Out-dependent secretome of *D. dadantii*, showing  
298 that besides pectinases several other proteins are secreted. If the number of pectinolytic  
299 enzymes secreted is almost identical in the various *Dickeya* species, the number of additional  
300 secreted proteins varies markedly. Among the proteins analyzed (Table 1), *D. paradisiaca* has  
301 only one (VirK) while *D. fangzhongdai* has ten. All the intermediate combinations can be found  
302 in the various species. There seems to be less variations in the *Pectobacterium* strains surveyed.  
303 It is tempting to speculate that the presence/absence of these proteins could influence the host  
304 preference of some *Dickeya* species, providing additional virulence factors favorable to infect  
305 certain hosts. Works that compare *Dickeya* strains to understand what makes difference in their  
306 host range or aggressivity often focus only on the presence of the six known types of secretion  
307 systems without analyzing what proteins could be secreted (18)(36)(37). An exhaustive analysis  
308 of the secreted proteins would be more informative.

309

310 Is there other T2SS-secreted proteins to be identified in *Dickeya* strains? No specific signal is  
311 present on T2SS-secreted proteins that would allow their identification. 2D gels which were  
312 used in previous studies performed on *D. dadantii* and *P. atrosepticum* to identify their  
313 secretome have a limited sensitivity (15)(34). More sensitive methods such as liquid  
314 chromatography-tandem mass spectrometry (LC-MS/MS) can now be used (38). However,  
315 they give many false positive results since periplasmic and cytoplasmic proteins are often found  
316 in the culture supernatant. The approach we used here allowed the identification of four new  
317 secreted proteins. However, all these methods have a drawback. They can only detect proteins

318 in conditions where they are produced. For instance, the rhamnogalacturonate lyase RhiE could  
319 only be detected when the bacteria were cultivated in the presence of rhamnose (39). The genes  
320 encoding YoaJ and VirK were not induced in *D. dianthicola* grown on potato (25). Another  
321 problem is that a protein may not exist in the strain tested. An analysis of the secretome of  
322 several *Dickeya* strains grown in several conditions will be necessary to have a global view of  
323 all the additional virulence factors that can be secreted by *Dickeya* species and evaluate their  
324 potential role in pathogenicity.

325

326

327

## 328 **ACKNOWLEDGMENTS**

329 We thank Lison Massardier and Florence Ruaudel for technical work and Nicole Cotte-Pattat  
330 for reading the manuscript. This work was supported by funding from CNRS, University Lyon  
331 1 and Agence Nationale de la Recherche (ANR-19-CE35-0016).

332

333

## 334 **REFERENCES**

- 335 1. Ma B, Hibbing ME, Kim H-S, Reedy RM, Yedidia I, Breuer J, Breuer J, Glasner JD, Perna  
336 NT, Kelman A, Charkowski AO. Host range and molecular phylogenies of the soft rot  
337 enterobacterial genera *Pectobacterium* and *Dickeya*. *Phytopathology*. 2007; 97:1150–63.
- 338 2. Fujikawa T, Hatomi H, Ota N. Draft genome sequences of seven strains of *Dickeya*  
339 *dadantii*, a quick decline-causing pathogen in fruit trees, isolated in Japan. *Microbiology*  
340 *Resource Announcements*. 2020; 9:e00609-20.

- 341 3. Samson R, Legendre JB, Christen R, Saux MF-L, Achouak W, Gardan L. Transfer of  
342 *Pectobacterium chrysanthemi* (Burkholder et al. 1953) Brenner *et al.* 1973 and *Brenneria*  
343 *paradisiaca* to the genus *Dickeya* gen. nov. as *Dickeya chrysanthemi* comb. nov. and  
344 *Dickeya paradisiaca* comb. nov. and delineation of four novel species, *Dickeya dadantii*  
345 sp. nov., *Dickeya dianthicola* sp. nov., *Dickeya dieffenbachiae* sp. nov. and *Dickeya zea*  
346 sp. nov. International Journal of Systematic and Evolutionary Microbiology. 2005;  
347 55:1415–27.
- 348 4. Brady CL, Cleenwerck I, Denman S, Venter SN, Rodríguez-Palenzuela P, Coutinho TA,  
349 De Vos P. Proposal to reclassify *Brenneria quercina* (Hildebrand and Schroth 1967)  
350 Hauben *et al.* 1999 into a new genus, *Lonsdalea* gen. nov., as *Lonsdalea quercina* comb.  
351 nov., descriptions of *Lonsdalea quercina* subsp. *quercina* comb. nov., *Lonsdalea quercina*  
352 subsp. *iberica* subsp. nov. and *Lonsdalea quercina* subsp. *britannica* subsp. nov.,  
353 emendation of the description of the genus *Brenneria*, reclassification of *Dickeya*  
354 *dieffenbachiae* as *Dickeya dadantii* subsp. *dieffenbachiae* comb. nov., and emendation of  
355 the description of *Dickeya dadantii*. International Journal of Systematic and Evolutionary  
356 Microbiology. 2012; 62:1592–1602.
- 357 5. van der Wolf JM, Nijhuis EH, Kowalewska MJ, Saddler GS, Parkinson N, Elphinstone  
358 JG, Pritchard L, Toth IK, Lojkowska E, Potrykus M, Waleron M, de Vos P, Cleenwerck  
359 I, Pirhonen M, Garland L, Hélias V, Pothier JF, Pflüger V, Duffy B, Tsror L, Manulis S.  
360 *Dickeya solani* sp. nov., a pectinolytic plant-pathogenic bacterium isolated from potato  
361 (*Solanum tuberosum*). International Journal of Systematic and Evolutionary  
362 Microbiology. 2014; 64:768–74.
- 363 6. Tian Y, Zhao Y, Yuan X, Yi J, Fan J, Xu Z, Hu B, De Boer SH, Li X. *Dickeya*  
364 *fangzhongdai* sp. nov., a plant-pathogenic bacterium isolated from pear trees (*Pyrus*

- 365 *pyrifolia*). International Journal of Systematic and Evolutionary Microbiology. 2016;  
366 66:2831–35.
- 367 7. Wang X, He S-W, Guo H-B, Han J-G, Thin KK, Gao J, Wang Y, Zhang X-X. *Dickeya*  
368 *oryzae* sp. nov., isolated from the roots of rice. International Journal of Systematic and  
369 Evolutionary Microbiology. 2020; 70:4171–78.
- 370 8. Parkinson N, DeVos P, Pirhonen M, Elphinstone J. *Dickeya aquatica* sp. nov., isolated  
371 from waterways. International Journal of Systematic and Evolutionary Microbiology.  
372 2014; 64:2264–6.
- 373 9. Hugouvieux-Cotte-Pattat N, Jacot-des-Combes C, Briolay J. *Dickeya lacustris* sp. nov., a  
374 water-living pectinolytic bacterium isolated from lakes in France. International Journal of  
375 Systematic and Evolutionary Microbiology. 2019; 69:721–26.
- 376 10. Oulghazi S, Pédrón J, Cigna J, Lau YY, Moumni M, Van Gijsegem F, Chan K-G, Faure  
377 D. *Dickeya undicola* sp. nov., a novel species for pectinolytic isolates from surface waters  
378 in Europe and Asia. International Journal of Systematic and Evolutionary Microbiology.  
379 2019; 69:2440–4.
- 380 11. Ji J, Hugouvieux-Cotte-Pattat N, Robert-Baudouy J. Molecular cloning of the *outJ* gene  
381 involved in pectate lyase secretion by *Erwinia chrysanthemi*. Molecular Microbiology.  
382 1989; 3:285–93.
- 383 12. Yang C-H, Gavilanes-Ruiz M, Okinaka Y, Vedel R, Berthuy I, Boccara M, Chen JW-T,  
384 Perna NT, Keen NT. *hrp* genes of *Erwinia chrysanthemi* 3937 are important virulence  
385 factors. Molecular Plant-Microbe Interactions. 2002; 15:472–480.



- 386 13. Andro T, Chambost JP, Kotoujansky A, Cattaneo J, Bertheau Y, Barras F, Van Gijsegem  
387 F, Coleno A. Mutants of *Erwinia chrysanthemi* defective in secretion of pectinase and  
388 cellulase. *Journal of Bacteriology*. 1984; 160:1199–203.
- 389 14. Hugouvieux-Cotte-Pattat N, Condemine G, Shevchik VE. Bacterial pectate lyases,  
390 structural and functional diversity. *Environmental Microbiology Reports*. 2014; 6:427–  
391 40.
- 392 15. Kazemi-Pour N, Condemine G, Hugouvieux-Cotte-Pattat N. The secretome of the plant  
393 pathogenic bacterium *Erwinia chrysanthemi*. *Proteomics*. 2004; 4:3177–3186.
- 394 16. Coulthurst SJ, Lilley KS, Hedley PE, Liu H, Toth IK, Salmond GPC. DsbA plays a critical  
395 and multifaceted role in the production of secreted virulence factors by the phytopathogen  
396 *Erwinia carotovora* subsp. *atroseptica*. *Journal of Biological Chemistry*. 2008;  
397 283:23739–53.
- 398 17. Liu L, Gueguen-Chaignon V, Gonçalves IR, Rascle C, Rigault M, Dellagi A, Loisel E,  
399 Poussereau N, Rodrigue A, Terradot L, Condemine G. A secreted metal-binding protein  
400 protects necrotrophic phytopathogens from reactive oxygen species. *Nature*  
401 *Communications*. 2019; 10:4853.
- 402 18. Potrykus M, Golanowska M, Hugouvieux-Cotte-Pattat N, Lojkowska E. Regulators  
403 involved in *Dickeya solani* virulence, genetic conservation, and functional variability.  
404 *Molecular Plant-Microbe Interactions* 2014; 27:700–11.
- 405 19. Pédrón J, Chapelle E, Alunni B, Van Gijsegem F. Transcriptome analysis of the *Dickeya*  
406 *dadantii* *PecS* regulon during the early stages of interaction with *Arabidopsis thaliana*.  
407 *Molecular Plant Pathology*. 2018; 19:647–63.

- 408 20. Jiang X, Zghidi-Abouzid O, Oger-Desfeux C, Hommais F, Greliche N, Muskhelishvili G,  
409 Nasser W, Reverchon S. Global transcriptional response of *Dickeya dadantii* to  
410 environmental stimuli relevant to the plant infection. *Environmental Microbiology*. 2016;  
411 18:3651–72.
- 412 21. Hommais F, Oger-Desfeux C, Van Gijsegem F, Castang S, Ligori S, Expert D, Nasser W,  
413 Reverchon S. PecS Is a global regulator of the symptomatic phase in the phytopathogenic  
414 bacterium *Erwinia chrysanthemi* 3937. *Journal of Bacteriology*. 2008; 190:7508–22.
- 415 22. Tancos MA, Lowe-Power TM, Peritore-Galve FC, Tran TM, Allen C, Smart CD. Plant-  
416 like bacterial expansins play contrasting roles in two tomato vascular pathogens.  
417 *Molecular Plant Pathology*. 2018; 19:1210–21.
- 418 23. Narváez-Barragán DA, Tovar-Herrera OE, Torres M, Rodríguez M, Humphris S, Toth IK,  
419 Segovia L, Serrano M, Martínez-Anaya C. Expansin-like Ex11 from *Pectobacterium* is a  
420 virulence factor required for host infection, and induces a defence plant response involving  
421 ROS, and jasmonate, ethylene and salicylic acid signalling pathways in *Arabidopsis*  
422 *thaliana*. *Scientific Reports*. 2020; 10:7747.
- 423 24. Rocha J, Shapiro LR, Kolter R. A horizontally acquired expansin gene increases virulence  
424 of the emerging plant pathogen *Erwinia tracheiphila*. *Scientific Reports*. 2020; 10:21743.
- 425 25. Raoul des Essarts Y, Pédrón J, Blin P, Van Dijk E, Faure D, Van Gijsegem F. Common  
426 and distinctive adaptive traits expressed in *Dickeya dianthicola* and *Dickeya solani*  
427 pathogens when exploiting potato plant host. *Environmental Microbiology*. 2019.  
428 21:1004–18.
- 429 26. Tjalsma H, Antelmann H, Jongbloed JDH, Braun PG, Darmon E, Dorenbos R, Dubois J-  
430 YF, Westers H, Zanen G, Quax WJ, Kuipers OP, Bron S, Hecker M, van Dijk JM.

- 431 Proteomics of protein secretion by *Bacillus subtilis*: Separating the “secrets” of the  
432 secretome. *Microbiology and Molecular Biology Reviews*. 2004; 68:207–33.
- 433 27. Condemine G, Robert-Baudouy J. Tn5 insertion in *kdgR*, a regulatory gene of the  
434 polygalacturonate pathway in *Erwinia chrysanthemi*. *FEMS Microbiology Letters*. 1987;  
435 42:39–46.
- 436 28. Reverchon S, Nasser W, Robert-Baudouy J. *pecS*: a locus controlling pectinase, cellulase  
437 and blue pigment production in *Erwinia chrysanthemi*. *Molecular Microbiology*. 1994;  
438 11:1127–39.
- 439 29. Surgey N, Robert-Baudouy J, Condemine G. The *Erwinia chrysanthemi pecT* gene  
440 regulates pectinase gene expression. *Journal of Bacteriology*. 1996; 178:1593–99.
- 441 30. Nomura K, Nasser W, Kawagishi H, Tsuyumu S. The *pir* gene of *Erwinia chrysanthemi*  
442 EC16 regulates hyperinduction of pectate lyase virulence genes in response to plant  
443 signals. *Proceedings of the National Academy of Sciences*. 1998; 95:14034–39.
- 444 31. Lebeau A, Reverchon S, Gaubert S, Kraepiel Y, Simond-Côte E, Nasser W, Van Gijsegem  
445 F. The GacA global regulator is required for the appropriate expression of *Erwinia*  
446 *chrysanthemi* 3937 pathogenicity genes during plant infection. *Environmental*  
447 *Microbiology*. 2008; 10:545–59.
- 448 32. Laasik E, Pöllumaa L, Pasanen M, Mattinen L, Pirhonen M, Mäe A. Expression of *nipP.w*  
449 of *Pectobacterium wasabiae* is dependent on functional *flgKL* flagellar genes.  
450 *Microbiology*. 2014; 160:179–86.
- 451 33. Keen NT, Boyd C, Henrissat B. Cloning and characterization of a xylanase gene from corn  
452 strains of *Erwinia chrysanthemi*. *Molecular Plant-Microbe Interactions*. 1996; 9:651-7.

- 453 34. Corbett M, Virtue S, Bell K, Birch P, Burr T, Hyman L, Lilley K, Poock S, Toth I,  
454 Salmond G. Identification of a new quorum-sensing-controlled virulence factor in *Erwinia*  
455 *carotovora* subsp. *atroseptica* secreted via the type II targeting pathway. *Molecular Plant-*  
456 *Microbe Interactions*. 2005; 18:334–42.
- 457 35. Mattinen L, Nissinen R, Riipi T, Kalkkinen N, Pirhonen M. Host-extract induced changes  
458 in the secretome of the plant pathogenic bacterium *Pectobacterium atrosepticum*.  
459 *Proteomics*. 2007; 7:3527–37.
- 460 36. Alič Š, Pédrón J, Dreó T, Van Gijsegem F. Genomic characterisation of the new *Dickeya*  
461 *fangzhongdai* species regrouping plant pathogens and environmental isolates. *BMC*  
462 *Genomics*. 2019; 20:34.
- 463 37. Xu P, Wang H, Qin C, Li Z, Lin C, Liu W, Miao W. Analysis of the taxonomy and  
464 pathogenic factors of *Pectobacterium aroidearum* L6 using whole-genome sequencing  
465 and comparative genomics. *Frontiers in Microbiology*. 2021; a12:679102.
- 466 38. Burtnick MN, Brett PJ, DeShazer D. Proteomic Analysis of the *Burkholderia*  
467 *pseudomallei* type II secretome reveals hydrolytic enzymes, novel proteins, and the  
468 deubiquitinase TssM. *Infection and Immunity*. 2014; 82:3214–26.
- 469 39. Laatu M, Condemine G. Rhamnogalacturonate lyase RhiE is secreted by the Out system  
470 in *Erwinia chrysanthemi*. *Journal of Bacteriology*. 2003; 185:1642–9.
- 471 40. Resibois A, Colet M, Faelen M, Schoonejans E, Toussaint A.  $\phi$ EC2, a new generalized  
472 transducing phage of *Erwinia chrysanthemi*. *Virology*. 1984; 137:102–12.
- 473 41. Roeder DL, Collmer A. Marker-exchange mutagenesis of a pectate lyase isozyme gene in  
474 *Erwinia chrysanthemi*. *Journal of Bacteriology*. 1985; 164:51–6.

475 42. Bardonnnet N, Blanco C. 'uidA-antibiotic-resistance cassettes for insertion mutagenesis,  
476 gene fusions and genetic constructions. FEMS Microbiology Letters. 1992; 93:243–7.

477

478

479 Fig 1: Identification of new secreted proteins by *D. dadantii*. Wild-type and *outD* mutant strains  
480 containing plasmid bearing the gene of the selected protein were grown overnight in LB  
481 medium. The supernatant (S) and cellular (C) fractions were separated by SDS-PAGE. After  
482 blotting, the proteins were detected with Ni-NTA-HRP.

483

484 Fig. 2: Alignment of Svf proteins. The sequences of *D. dadantii* SvfA (Dda3937\_01687) and  
485 SvfB (Dda3937\_00585), *D. fangzhongdai* SvfC (CVE23\_15565), *B. cereus* WP-193674364.1  
486 and *Photorhabdus asymbiotica* CAQ86327.1, without their signal sequence, were aligned with  
487 Clustal omega. Identical residues are indicated by a star and chemically equivalent residues by  
488 a double dot.

489

490 Fig. 3. Virulence of *svfA* and *svfB* mutants. A. Potatoes were infected with the wild type strain,  
491 and the *svfA*, the *svfB* and the *svfA svfB* mutants. Rotten tissue was weighed after 48 h. B.  
492 Complementation of the *svfA* mutation. Potatoes were infected with the wild type strain, the  
493 *svfA* mutant containing the empty plasmid pBBRGm and the *svfA* mutant containing the  
494 pBBRGm plasmid bearing *svfA*. Rotten tissue was weighed after 48h. Statistical tests were  
495 performed using the Wilcoxon- Mann-Whitney test. The *p*-value were compared with an alpha  
496 risk of 4%.  $p < 0.001=***$ ,  $p < 0.005=**$ ,  $p < 0.01=*$ .

497

498

499 Fig 4 : Expression of *svfA* and *svfB* in various growth conditions. A. The *D. dadantii* strain  
500 A6418 containing the *svfA-uidA* fusion and its derivative strains containing an additional  
501 regulatory mutation were grown in M63 medium in the presence of the indicated compounds  
502 (Y = glycerol, G = glucose, A = galacturonate, PGA = polygalacturonate, E = chicory chunks).

503 Strains with additional mutations were grown with glycerol as a carbon source except the *crp*  
504 mutant that was grown with 0.2% glucose.  $\beta$ -glucuronidase activity was measured with *p*-  
505 nitrophenyl- $\beta$ -D-glucuronate. B. Similar experiment for the *D. dadantii* strain A6467  
506 containing the *svfB-uidA* fusion and its derivative strains containing an additional regulatory  
507 mutation. Activities are expressed in  $\mu$ moles of *p*-nitrophenol produced per minute and per  
508 milligram of bacterial dry weight  $\pm$  standard deviation. Data are expressed as the mean (n = 6)  
509 from six independent experiments. Statistical tests were performed using the Wilcoxon- Mann-  
510 Whitney test. The *p*-value were compared with an alpha risk of 4%.  $p < 0.001=***$ ,  $p <$   
511  $0.005=**$ ,  $p < 0.01=*$ .

512

513

514 Table 1: Presence of Out-secreted proteins in various *Dickeya* and *Pectobacterium* strains.

515

516 Table 2: Oligonucleotides and strains used in this study.

517

518

519

520 .

521

522 Table 1 : Presence of Out-secreted proteins in various *Dickeya* and *Pectobacterium* strains.  
523

| Strain                 | <i>SvfA</i> | <i>SvfB</i> | <i>SvfC</i> | <i>YoaJ</i> | <i>VirK</i> | <i>IbpS</i> | <i>NipE</i> | <i>XynA</i> | <i>AvrL</i> |
|------------------------|-------------|-------------|-------------|-------------|-------------|-------------|-------------|-------------|-------------|
| <i>D. dadantii</i>     | 1           | 1           | 0           | 1           | 1           | 1           | 1           | 1           | 2           |
| <i>D. diffebachiae</i> | 1           | 1           | 0           | 1           | 1           | 1           | 1           | 0           | 2           |
| <i>D. fangzhongdai</i> | 1           | 1           | 1           | 1           | 1           | 1           | 1           | 1           | 2           |
| <i>D. solani</i>       | 1           | 1           | 0           | 1           | 1           | 1           | 1           | 1           | 2           |
| <i>D. zea</i>          | 0           | 1           | 0           | 1           | 1           | 1           | 1           | 1           | 1           |
| <i>D. oryzae</i>       | 1           | 1           | 0           | 1           | 1           | 1           | 1           | 1           | 0           |
| <i>D. dianthicola</i>  | 0           | 1           | 0           | 1           | 1           | 1           | 1           | 0           | 1           |
| <i>D. undicola</i>     | 1           | 0           | 1           | 1           | 1           | 1           | 1           | 0           | 1           |
| <i>D. lacustris</i>    | 1           | 0           | 0           | 0           | 0           | 1           | 1           | 0           | 2           |
| <i>D. aquatica</i>     | 1           | 0           | 0           | 1           | 0           | 1           | 1           | 0           | 2           |
| <i>D. chrysanthemi</i> | 0           | 0           | 0           | 1           | 1           | 1           | 1           | 0           | 1           |
| <i>D. paradisiaca</i>  | 0           | 0           | 0           | 0           | 1           | 0           | 0           | 0           | 0           |
| <i>D. poaceiphila</i>  | 0           | 0           | 0           | 0           | 1           | 1           | 0           | 1           | 0           |
| <i>P. atrosepticum</i> | 0           | 0           | 0           | 1           | 0           | 1           | 1           | 0           | 1           |
| <i>P. carotovorum</i>  | 1           | 1           | 0           | 1           | 0           | 1           | 1           | 0           | 1           |
| <i>P. parmentieri</i>  | 0           | 0           | 0           | 1           | 0           | 1           | 1           | 0           | 1           |
| <i>P. polaris</i>      | 0           | 0           | 0           | 1           | 0           | 1           | 1           | 0           | 1           |

524 The strains used in this study are *D. dadantii* 3937, *D. aquatica* 174/2, *D. chrysanthemi*  
525 ATCC 11663, *D. dadantii* subsp *dieffenbachiae* NCPPB 2976, *D. dianthicola* NCPPB 453, *D.*  
526 *fangzhongdai* DSM 101947, *D. lacustris* S29, *D. oryzae* ZYY5, *D. paradisiaca* ATCC 33242,  
527 *D. poaceiphila* NCPPB 569, *D. solani* IPO 2222, *D. undicola* 2B12, *D. zea* NCPPB 2538, *P.*  
528 *atrosepticum* ATCC 33260, *P. carotovorum* subsp. *carotovorum* ATCC 15713, *P.*  
529 *parmentieri* RNS08.42.1A and *P. polaris* NIBIO 1006. The presence and number of proteins  
530 detected by search of the corresponding gene in the genome in each strain is indicated.  
531

532



533 Table 2: Oligonucleotides and strains used in this study

534

535 Oligonucleotides

|     |           |                                               |
|-----|-----------|-----------------------------------------------|
| 536 | 17176H+   | CCTCCTGAGATTAGAGAGAG                          |
| 537 | 17176A    | CGCGCCGGTGTTTTTCTTGCG                         |
| 538 | 17176H-   | GGTTAGTGATGGTGATGGTGATGCTGAATATTGAGCGACGTGC   |
| 539 | 17176XbaF | GAACAGGATGTGTCCTCTTCTAGACACAAAGCGCTGCCGTGCG   |
| 540 | 17176XbaR | CGCACGCAGCGCTTTGTGTCTAGAAGAGGACACATCCTGTTC    |
| 541 | 15544L2+  | CTAAGAATCAGTCAGTTTGCG                         |
| 542 | 15544L2-  | AGGCAGATAACGCTACTCGCC                         |
| 543 | 15544H+   | ATTTATACTCGCCACCGATGC                         |
| 544 | 15544XmaF | GCCTTGCGAGCCCCCGCTCCCGGGCTGTCTCGGGTTACCGTG    |
| 545 | 15544XmaR | CACGGTAACCCGAGACAGCCCGGGAGCGGGGGCTCGCAAGGC    |
| 546 | 15544H-   | GGTTAGTGATGGTGATGGTGATGTTTAATATAGGTCTGTGTGAAC |
| 547 | 14642H+   | GGTGAGGAATAATTCTGGCC                          |
| 548 | 14642H-   | GGTTAGTGATGGTGATGGTGATGAGGCAGTTGTACTTTTCCAG   |
| 549 | VirKH+    | TGCCGTATGTGATAGTCACG                          |
| 550 | VirKH-    | CCTTAGTGATGGTGATGGTGATGTTGCTTGAAGAAGCGGATATC  |

551

552

553 *Dickeya dadantii* strains

554

|     |       |                                                       |                       |
|-----|-------|-------------------------------------------------------|-----------------------|
| 555 | 3937  | Wild type                                             | Laboratory collection |
| 556 | A5653 | <i>outD</i> ::CmR                                     | Laboratory collection |
| 557 | A6417 | <i>svfB</i> ::CmR                                     | This work             |
| 558 | A6418 | <i>svfA</i> :: <i>uidA</i> -kanR                      | This work             |
| 559 | A3838 | <i>kdgR</i> ::Mu-CmR                                  | (19)                  |
| 560 | A3845 | <i>pecS</i> ::Mu-CmR                                  | (28)                  |
| 561 | A3846 | <i>pecT</i> ::CmR                                     | (29)                  |
| 562 | A3849 | <i>pir</i> ::CmR                                      | Laboratory collection |
| 563 | A4237 | <i>gacA</i> ::CmR                                     | (31)                  |
| 564 | A6434 | <i>kdgR</i> ::Mu-CmR <i>svfA</i> :: <i>uidA</i> -kanR | This work             |
| 565 | A6435 | <i>pecS</i> ::Mu-CmR <i>svfA</i> : <i>uidA</i> -kanR  | This work             |
| 566 | A6436 | <i>pecT</i> ::CmR <i>svfA</i> :: <i>uidA</i> -kanR    | This work             |
| 567 | A6436 | <i>pir</i> ::CmR <i>svfA</i> :: <i>uidA</i> -kanR     | This work             |

|     |       |                                     |           |
|-----|-------|-------------------------------------|-----------|
| 568 | A6437 | <i>gacA::CmR svfA::uidA-kanR</i>    | This work |
| 569 | A6467 | <i>svfB::uidA-kanR</i>              | This work |
| 570 | A6469 | <i>kdgR::Mu-CmR svfB::uidA-kanR</i> | This work |
| 571 | A6470 | <i>pecS::Mu-CmR svfB::uidA-kanR</i> | This work |
| 572 | A6471 | <i>pecT::CmR svfB::uidA-kanR</i>    | This work |
| 573 | A6472 | <i>pir::CmR svfB::uidA-kanR</i>     | This work |
| 574 | A6473 | <i>gacA::CmR svfB::uidA-kanR</i>    | This work |
| 575 |       |                                     |           |
| 576 |       |                                     |           |
| 577 |       |                                     |           |
| 578 |       |                                     |           |
| 579 |       |                                     |           |

580

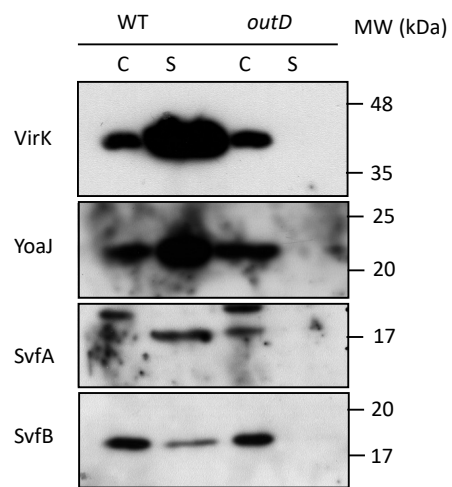

581

582

583

584

585

586

587

Fig. 1

588

```

SvfA      -----AQTS---DEPVQTVITALD--SPFVDYPLSAGSEQDVSSEHKALRAPAPAL 47
SvfC      -----APAPAL 6
Bacillus  -----APAPPL 6
SvfB      GYSQTINNTDEAGPPIELG---LTAFD-SL-ESNSPLSAARDTS-RASTSGALRAPAPAL 54
Photorhabdus -----QTEQLPKVPAAQKVLIEQSOLLPNVKSPIR-AEERD-LKIEDGSVHAPAPGL 50
          *****

SvfA      SSVQVYAVYSSSLKGGWQAVPT-NTLSL-SGYAGGTLRIAVLEVGYGGRNIGWLNGGQTS- 104
SvfC      SGLRIKVLSGVYGGTWQYAPV-NAVSIKPGYAGGTLQIAVVETGYGGRNIGWINGEQKK- 64
Bacillus  TSLNVVKVESQL-GGVEFIGA--NNLSTVKDHGGSYLYIYTNEMGYGRNPIAQMSGQKLLK 64
SvfB      SRVTVYAVGSSN-CGWEYMTSIGQLSTTCDHGGQLRVAVQEIYGNPNPVAWMNGGVLPR 113
Photorhabdus TNMWVYAVGSTN-CGWEYTSNL--FATTCDHGGQLRAAVLEIGYGYSSPAMMNGLLPN 107
          : : : : . : .: .:* * . * *** . . . :.*

SvfA      --PYQVNPVCVVSGRYTESCPAGSIVSGWMAYFNADNMSSVTFRYQSTSTNFPNRTLSTS 162
SvfC      --PDSVKLACLVKGEMTDNCPRGATGAGWIAIYFSANYQTSVTFRYQSTSANFPYKTLSTS 122
Bacillus  VDS---KMI-----DINGDRTVDGWYKWDASGQNGQFKYQNTSTNAPWNTLFTS 112
SvfB      SANYQTDGICIVGNQYTFPCPAGYTVVGMYYNLDGTDNGQFKFQDSTNAPRNLTFTQ 173
Photorhabdus SAMYSSKTVCITNGYITWPCTAGQTVVGYLHEYNLNLDGNQNGTFRYQNTSTNSPWNMTMSVQ 167
          . . . * : . . . * : * . * * * * * * : . .

SvfA      LNIQ 166
SvfC      LTIK 126
Bacillus  LNIK 116
SvfB      TYIK 177
Photorhabdus INIL 171
          *

```

589

590

591

592

593

Fig . 2

594

595

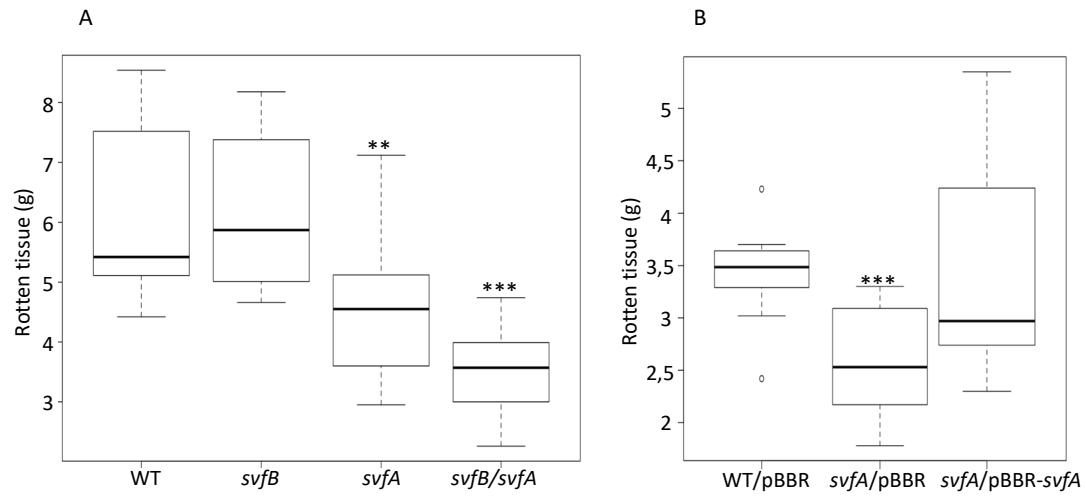

596

597

Fig. 3

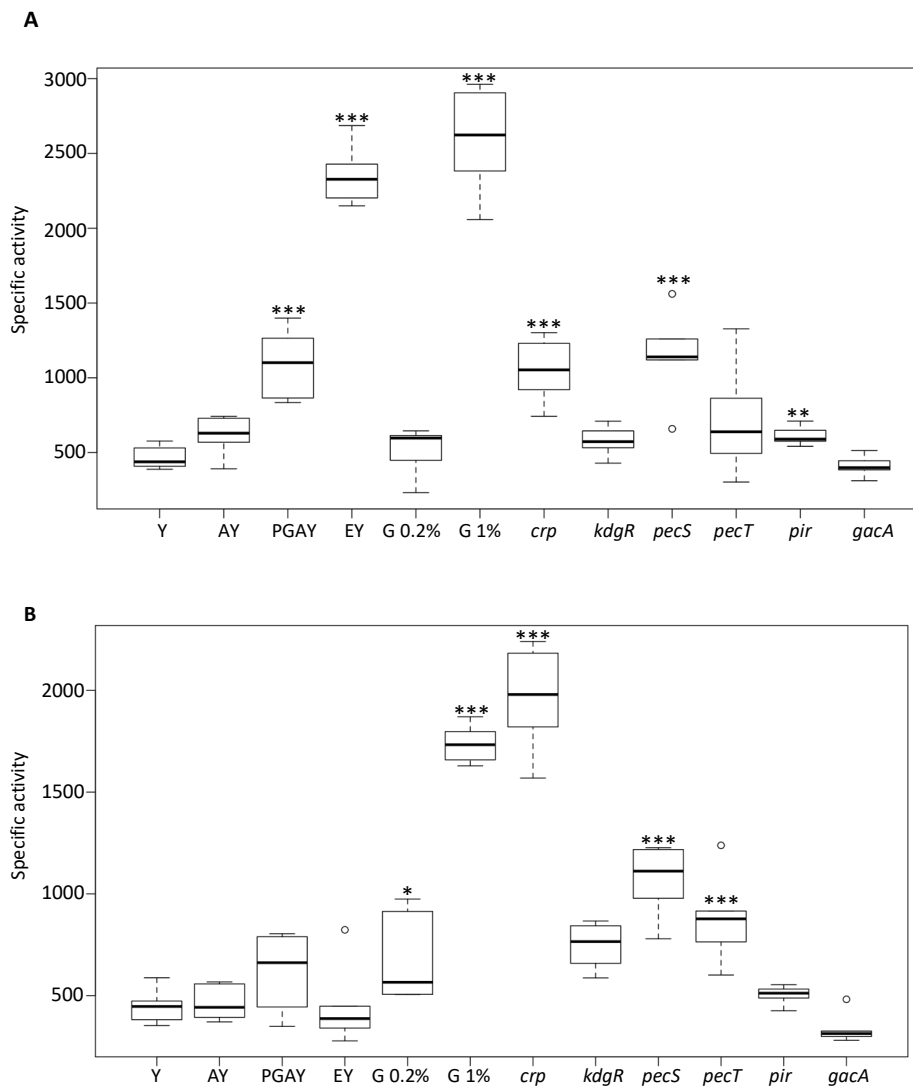

598

599

600

Fig. 4
